# Supplementary material for: In the search of active nanocarriers for delivery of mitomycin C drug
Source: Royal Society of Chemistry journal article supplement (doi:10.1039/d0ma00018c), 2020-01-01
Supplement: d0ma00018c1.pdf [file d0ma00018c1.pdf]

## **Electronic Supplementary Information**

### **In the search of active nanocarriers for delivery of mitomycin C drug**

Afshan Mohajeri\* and Soode Amigh

Department of Chemistry, College of Sciences, Shiraz University, Shiraz, Iran

#### **\*Corresponding Author**

\*E-mail: mohajeriazf@gmail.com.

Phone: +987136137161. Fax: +987136460788

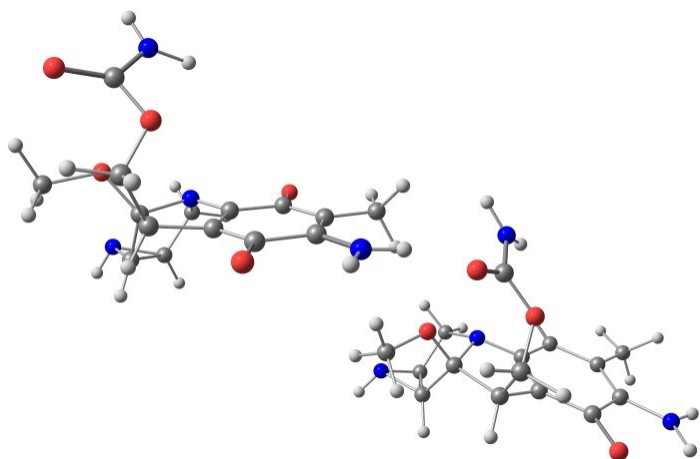

$$E_{bind} = -10.19 \text{ kcal mol}^{-1}$$

$$E_{int} = -11.12 \text{ kcal mol}^{-1}$$

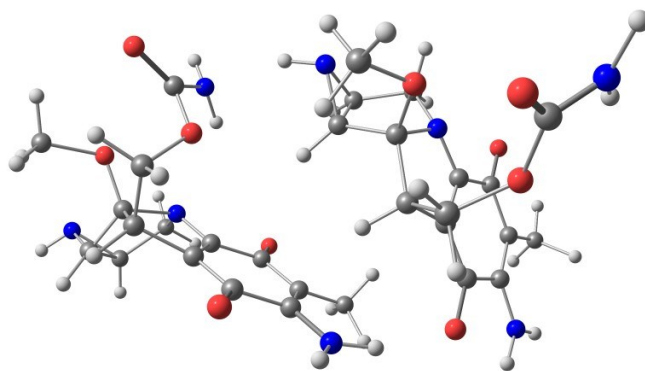

$$E_{bind} = -12.99 \text{ kcal mol}^{-1}$$

$$E_{int} = -13.65 \text{ kcal mol}^{-1}$$

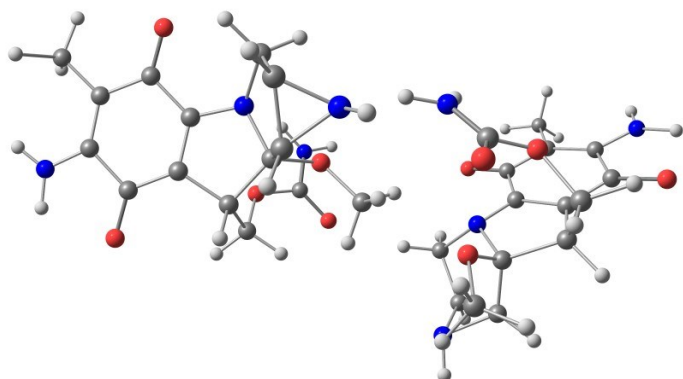

$$E_{bind} = 13.92 \text{ kcal mol}^{-1}$$

$$E_{int} = -14.12 \text{ kcal mol}^{-1}$$

**Fig. S1.** Stable configurations for the interaction of two MMC molecules together with corresponding binding and interaction energies.

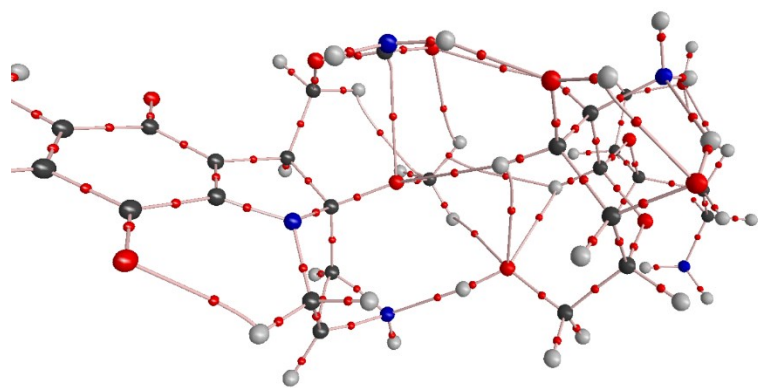

MMC-CS

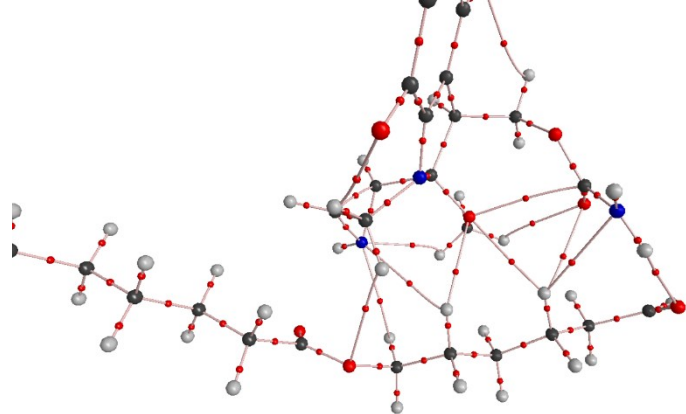

MMC-PCL

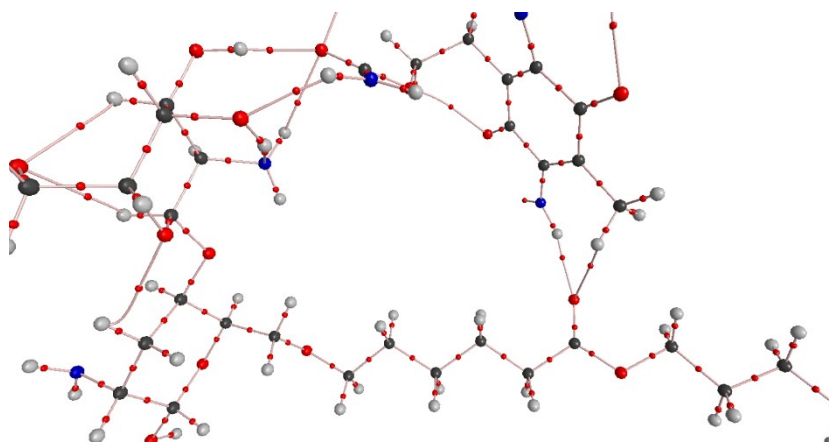

MMC-PCL/CS

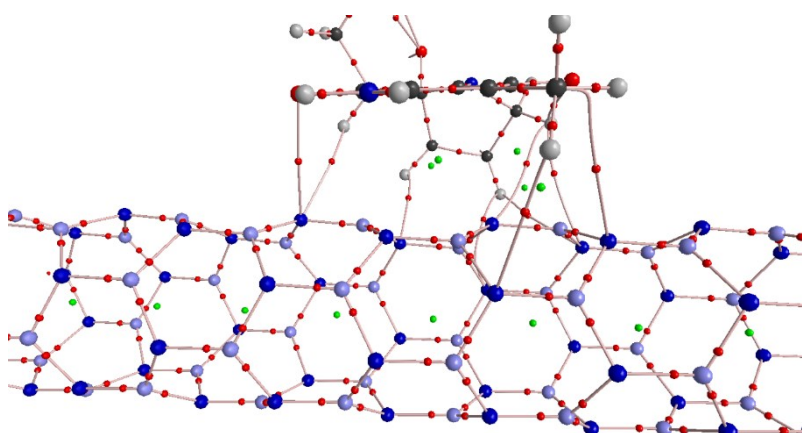

MMC-BNNT-21

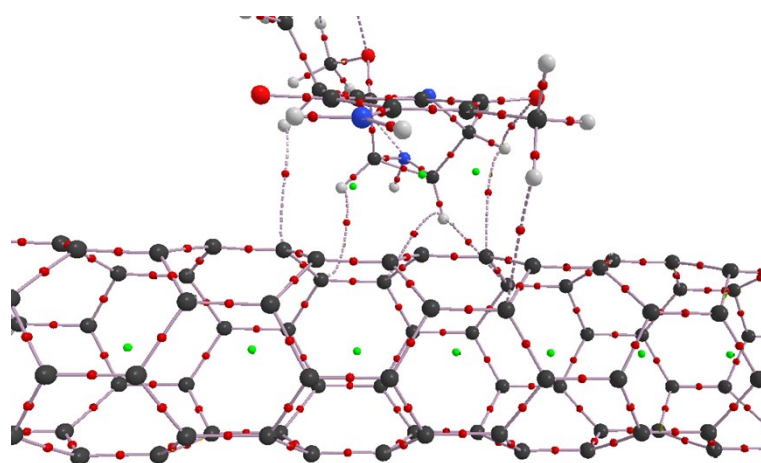

MMC-CNT-21

**Fig. S2** QTAIM molecular graphs for the most stable complexes between MMC and carriers. Lines connecting the nuclei are the bond paths and the small red and green dots indicate the positions of the BCPs and CCPs.

**Table S1.** Condensed nucleophilicity ( $f^-$ ) and electrophilicity ( $f^+$ ) for different sites in considered carriers.

| Carrier | Site  | $f^-$ | $f^+$ |
|---------|-------|-------|-------|
| CS      | O(3)  | 0.007 | -     |
|         | O(7)  | 0.021 | -     |
|         | O(8)  | 0.017 | -     |
|         | O(11) | 0.014 | -     |
|         | O(15) | 0.007 | -     |
|         | O(18) | 0.002 | -     |
|         | O(19) | 0.064 | -     |
|         | O(21) | 0.006 | -     |
|         | N(10) | 0.075 | -     |
|         | N(22) | 0.467 | -     |
|         | H(31) | -     | 0.017 |
|         | H(40) | -     | 0.018 |
|         | H(41) | -     | 0.009 |
|         | H(43) | -     | 0.026 |
|         | H(44) | -     | 0.038 |
| H(45)   | -     | 0.039 |       |
| H(46)   | -     | 0.005 |       |
| PCL     | O(7)  | 0.052 | -     |
|         | O(8)  | 0.194 | -     |
|         | O(15) | 0.294 | -     |
|         | O(37) | 0.004 | -     |
|         | H(36) | -     | 0.123 |
|         | H(38) | -     | 0.007 |
|         | O(7)  | 0.033 | -     |
|         | O(8)  | 0.112 | -     |

|        |       |       |       |
|--------|-------|-------|-------|
| PCL/CS | O(15) | 0.055 | -     |
|        | O(16) | 0.145 | -     |
|        | H(17) | -     | 0.019 |
|        | H(26) | -     | 0.050 |
|        | H(27) | -     | 0.050 |
